# Supplementary material for: A kinetically persistent isomer found for pentazole: a global potential energy surface survey
Source: Royal Society of Chemistry journal article supplement (doi:10.1039/c8cc09626k), 2019-01-01
Supplement: c8cc09626k1.pdf [file c8cc09626k1.pdf]

Supporting Information available for

# **Kinetically persistent isomer found for pentazole: Global potential energy surface survey**

Xiao-xu Bo<sup>a</sup>, Hai-feng Zheng<sup>a</sup>, Jing-fan Xin<sup>\*a,b</sup> and Yi-hong Ding<sup>\*a</sup>

<sup>a</sup>Laboratory of Theoretical and Computational Chemistry, Institute of Theoretical  
Chemistry,

Jilin University, Changchun 130023,

People's Republic of China

<sup>b</sup>College of Chemistry and Chemical Engineering,

Chifeng University Chifeng 024000

People's Republic of China

For submission to:

Chemical Communications

## Table of Contents

|                                                                                                                                                                                                                                                                 |    |
|-----------------------------------------------------------------------------------------------------------------------------------------------------------------------------------------------------------------------------------------------------------------|----|
| 1. Theoretical methods.....                                                                                                                                                                                                                                     | 3  |
| 2. Table S1 The Wiberg bond index of the N <sub>5</sub> H(A1,C1) at the B3LYP/6-311G(2d,d,p) level.....                                                                                                                                                         | 6  |
| 3. Table S2 The Substitution effect of C1.[a-- rate-determining barrier] The rate-determining barrier of substituted N <sub>5</sub> R (C1) at the CBS-QB3 level with inclusion of ZPVE correction and EA ( Electron Affinities) from references 1.....          | 6  |
| 4. Fig. S1 Electron affinity (EA) and electronegativity (EN) with the linear correlation coefficient.....                                                                                                                                                       | 7  |
| 5. Fig. S2 Isomerization and decomposition pathways of N <sub>5</sub> H (A,B,C,D) in singlet state. Relative energies (kcal/mol) were obtained at CBS-QB3. The transition states for self-isomerization or conversion between mirror isomers are not shown..... | 9  |
| 6. Fig. S3 Reference reactions for proposed synthetic routes of C1.....                                                                                                                                                                                         | 11 |
| 7. Table S3 The half-life of C1 at different temperatures.....                                                                                                                                                                                                  | 12 |
| 8. Fig. S4 Born-Oppenheimer molecular dynamics simulation of C1 at different temperatures...                                                                                                                                                                    | 12 |
| 9. Table S4 Cartesian coordinates of the optimized isomers and transition states.....                                                                                                                                                                           | 14 |

## 1. Theoretical methods

**GRRM:**<sup>1-2</sup> The stationary points of the parent N<sub>5</sub>H potential energy surfaces were confirmed by using the ADDF algorithm<sup>2</sup>, implemented in the GRRM program. ADDF can follow reaction pathways starting from local minima on the PES toward TSs structures and dissociation channels. Geometric structures with weakly interacting fragments were reoptimized using the ultrafine grid and tight convergence criterion.

**GPESS:**<sup>3</sup> The GPESS platform includes isomeric search<sup>3a</sup> and transition state search<sup>3k</sup>. The isomer search was based on the grid search program.<sup>3a</sup> The transition state search was divided into two types, one is the isomer's conversion and the other is the isomer's decomposition. For the interconversion TS search, the "QST2" algorithm was applied, which yet has a difficulty in placing atoms in the same atomic order between reactant and product (especially for molecules with many homo-atomic elements). This was treated in GPESS by automatic enumeration of all possible combinations. Besides, the decomposition TS search was considered directing to some relatively stable molecular fragments like N<sub>2</sub>, CO<sub>2</sub> and NO.

The kinetic stability of molecular N<sub>5</sub>H(I) reaction pathways were determined through a systematic and automated exploration of pre-reaction complexes, TSs and product structures, using GRRM and GPESS methods at the B3LYP<sup>4</sup>/6-31G(d) level. The connections of all TSs were checked by the intrinsic reaction coordinate (IRC) calculations (although GRRM can automatically determine similar connection). Then, for structural and energetic refinement, the composite CBS-QB3<sup>5</sup> method was applied, which uses the B3LYP/6-311G(2d,d,p) geometries and frequencies followed by a series of higher level single-point energy calculations. Note that for the kinetic stability of A1 and C1, the more cost composite methods G4<sup>6</sup> and W1BD<sup>7</sup> were applied. To obtain detailed Wiberg bond indices<sup>8</sup> information, we performed the natural bond orbital (NBO) analysis. In the current work, all electronic state calculations were carried out within the Gaussian 03<sup>9</sup> and 09<sup>10</sup> program packages.

## References

- 1 (a) S. Maeda and K. Ohno, *J. Phys. Chem. A*, 2005, **109**, 5742; (b) Y. Luo, S. Maeda and K. Ohno, *J. Phys. Chem. A*, 2008, **112**, 5720; (c) S. Maeda and K. Ohno, *J. Am. Chem. Soc.*, 2008, **130**, 17228; (d) Vikas and G. Kaur, *J. Chem. Phys.*, 2013, **139**, 224311; (e) S. Maeda, Y. Harabuchi, Y. Osada, T. Taketsugu, K. Morokuma, K. Ohno, GRRM14. <http://grm.chem.tohoku.ac.jp/GRRM/> (accessed

10.05.15).

- 2 S. Maeda, K. Ohno and K. Morokuma, *Phys. Chem. Chem. Phys.*, 2013, **15**, 3683.
- 3 (a) C. B. Shao and Y. H. Ding, *Jilin University, Changchun, China*, 2010.; (b) Z. H. Cui, M. Contreras, Y. H. Ding and G. Merino, *J. Am. Chem. Soc.*, 2011, **133**, 13228; (c) S. M. Gao and Y. H. Ding, *RSC Adv.*, 2012, **2**, 11764; (d) X. Y. Tang, Z. H. Cui, C. B. Shao and Y. H. Ding, *Int. J. Quantum. Chem.*, 2012, **112**, 1299; (e) C. Guo, Z. H. Cui and Y. H. Ding, *Struct. Chem.*, 2013, **24**, 263; (f) C. Guo, Z. H. Cui and Y. H. Ding, *Int. J. Quantum. Chem.*, 2013, **113**, 2213; (g) C. Guo, C. Wang and Y. H. Ding, *Struct. Chem.*, 2014, **25**, 1023; (h) X. Y. Zhang and Y. H. Ding, *Comput.Theor. Chem.*, 2014, 1048, 18; (i) X. Y. Zhang and Y. H. Ding, *RSC Adv.*, 2015, **5**, 27134; (j) J. Xu, X. Zhang, S. Yu, Y. H. Ding and K. H. Bowen, *J. Phys. Chem. Lett.*, 2017, **8**, 2263; (k) transition state search: Y. H. Ding, *Jilin University, Changchun, China*, 2015. (l) F. F. He and Y. H. Ding, *RSC Adv.*, 2016, **6**, 26441; (m) Xiao-xu Bo and Yi-hong Ding, GPESS version 1.0, 2018.
- 4 (a) R. G. Parr and W. Yang, *Density-functional theory of atoms and molecules*, Oxford University Press, Oxford, 1989; (b) A. D. Becke, *J. Chem. Phys.*, 1992, **96**, 2155; (c) J. P. Perdew, J. A. Chevary, S. H. Vosko, K. A. Jackson, M. R. Pederson, D. J. Singh and C. Fiolhais, *Phys. Rev. B: Condens. Matter Mater. Phys.*, 1992, **46**, 6671.
- 5 (a) J. A. M. Jr, M. J. Frisch, J. W. Ochterski and G. A. Petersson, *J. Chem. Phys.*, 1999, **110**, 2822; (b) J. A. Montgomery. Jr., M. J. Frisch, J. W. Ochterski and G. A. Petersson, *J. Chem. Phys.*, 2000, **112**, 6532.
- 6 L. A. Curtiss, P. C. Redfern, K. Raghavachari, *J. Chem. Phys.* 2007, **126**, 084108.
- 7 E. C. Barnes, G. A. Petersson, J. A. Montgomery, Jr., M. J. Frisch, J. M. L. Martin, *J. Chem. Theory Comput.*, 2009, **5**, 2687.
- 8 K. B. Wiberg, L. K. Olli, N. Golembeski and R. D. Adams, *J. Am. Chem. Soc.*, 1980, **102**, 7467.
- 9 M. J. Frisch, G. W. Trucks, H. B. Schlegel, G. E. Scuseria, M. A. Robb, J. R. Cheeseman, J. A. Montgomery, Jr., T. Vreven, K. N. Kudin, J. C. Burant, J. M. Millam, S. S. Iyengar, J. Tomasi, V. Barone, B. Mennucci, M. Cossi, G. Scalmani, N. Rega, G. A. Petersson, H. Nakatsuji, M. Hada, M. Ehara, K. Toyota, R. Fukuda, J. Hasegawa, M. Ishida, T. Nakajima, Y. Honda, O. Kitao, H. Nakai, M. Klene, X. Li, J. E. Knox, H. P. Hratchian, J. B. Cross, V. Bakken, C. Adamo, J. Jaramillo, R. Gomperts, R. E. Stratmann, O. Yazyev, A. J. Austin, R. Cammi, C. Pomelli, J. W. Ochterski, P. Y. Ayala, K. Morokuma, G. A. Voth, P. Salvador, J. J. Dannenberg, V. G. Zakrzewski, S. Dapprich, A.

- D. Daniels, M. C. Strain, O. Farkas, D. K. Malick, A. D. Rabuck, K. Raghavachari, J. B. Foresman, J. V. Ortiz, Q. Cui, A. G. Baboul, S. Clifford, J. Cioslowski, B. B. Stefanov, G. Liu, A. Liashenko, P. Piskorz, I. Komaromi, R. L. Martin, D. J. Fox, T. Keith, M. A. Al-Laham, C. Y. Peng, A. Nanayakkara, M. Challacombe, P. M. W. Gill, B. Johnson, W. Chen, M. W. Wong, C. Gonzalez, J. A. Pople, Gaussian 03, Revision D.02; Gaussian, Inc.: Wallingford, CT, 2004.
- 10 M. J. Frisch, G. W. Trucks, H. B. Schlegel, G. E. Scuseria, M. A. Robb, J. R. Cheeseman, G. Scalmani, V. Barone, B. Mennucci, G. A. Petersson, H. Nakatsuji, M. Caricato, X. Li, H. P. Hratchian, A. F. Izmaylov, J. Bloino, G. Zheng, J. L. Sonnenberg, M. Hada, M. Ehara, K. Toyota, R. Fukuda, J. Hasegawa, M. Ishida, T. Nakajima, Y. Honda, O. Kitao, H. Nakai, T. Vreven, J. A. Montgomery, Jr., J. E. Peralta, F. Ogliaro, M. Bearpark, J. J. Heyd, E. Brothers, K. N. Kudin, V. N. Staroverov, R. Kobayashi, J. Normand, K. Raghavachari, A. Rendell, J. C. Burant, S. S. Iyengar, J. Tomasi, M. Cossi, N. Rega, J. M. Millam, M. Klene, J. E. Knox, J. B. Cross, V. Bakken, C. Adamo, J. Jaramillo, R. Gomperts, R. E. Stratmann, O. Yazyev, A. J. Austin, R. Cammi, C. Pomelli, J. W. Ochterski, R. L. Martin, K. Morokuma, V. G. Zakrzewski, G. A. Voth, P. Salvador, J. J. Dannenberg, S. Dapprich, A. D. Daniels, O. Farkas, J. B. Foresman, J. V. Ortiz, J. Cioslowski, and D. J. Fox, Gaussian 09, Revision A.01; Gaussian, Inc., Wallingford CT, 2009.

2. Table S1 The Wiberg bond index of the N<sub>5</sub>H(A1,C1) at the B3LYP/6-311G(2d,d,p) level.

| N <sub>5</sub> H                                                                  | Bond index | N <sub>1</sub> -N <sub>2</sub> | N <sub>2</sub> -N <sub>3</sub> | N <sub>3</sub> -N <sub>4</sub> | N <sub>1</sub> -N <sub>4</sub> | N <sub>1</sub> -N <sub>5</sub> | N <sub>2</sub> -N <sub>5</sub> | N <sub>4</sub> -N <sub>5</sub> |
|-----------------------------------------------------------------------------------|------------|--------------------------------|--------------------------------|--------------------------------|--------------------------------|--------------------------------|--------------------------------|--------------------------------|
| 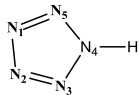 | Wiberg     | 1.347                          | 1.573                          | 1.286                          | 0.000                          | 1.573                          | 0.000                          | 1.286                          |
|  | Wiberg     | 0.985                          | 1.019                          | 1.019                          | 0.985                          | 0.983                          | 0.967                          | 0.967                          |

3. Table S2 The Substitution effect of C1.[a-- rate-determining barrier] The rate-determining barrier of substituted N<sub>5</sub>R (C1) at the CBS-QB3 level with inclusion of ZPVE correction and EA (Electron Affinities) from references 1.

| 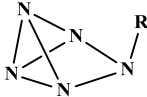 | tsC1/A4            | tsC1/P1            | NPA<br>(N <sub>5</sub> ) | Mulliken<br>(N <sub>5</sub> ) | Hirshfield<br>(N <sub>5</sub> ) | EA<br>(R)                  |
|-----------------------------------------------------------------------------------|--------------------|--------------------|--------------------------|-------------------------------|---------------------------------|----------------------------|
| 3D-NNNNN-R                                                                        |                    |                    |                          |                               |                                 |                            |
| (R=NO <sub>2</sub> )                                                              | 20.18 <sup>a</sup> | 20.71              | 0.341                    | 0.265                         | 0.162                           | 52.41( 52.42) <sup>1</sup> |
| (R=CN)                                                                            |                    | 19.34              | 0.216                    | 0.140                         | 0.191                           | 90.05( 89.06) <sup>1</sup> |
|                                                                                   |                    | 18.55 <sup>a</sup> |                          |                               |                                 |                            |
| (R=NCO)                                                                           | 21.95              | 17.86 <sup>a</sup> | 0.342                    | 0.172                         | -0.116                          | 83.27(83.22) <sup>1</sup>  |
| (R=CF <sub>3</sub> )                                                              | 17.66 <sup>a</sup> | 20.64              | 0.138                    | 0.050                         | 0.082                           | 40.57(46.35) <sup>1</sup>  |
| (R=F)                                                                             | 22.51              | 17.74 <sup>a</sup> | 0.232                    | 0.072                         | 0.224                           | 77.93(78.43) <sup>1</sup>  |
| (R=OH)                                                                            | 22.64              | 17.23 <sup>a</sup> | 0.408                    | 0.220                         | 0.107                           | 40.74( 42.15) <sup>1</sup> |
| (R=C <sub>2</sub> H)                                                              |                    | 16.85              | 0.181                    | -0.024                        | -0.118                          | 68.06(68.47) <sup>1</sup>  |
|                                                                                   |                    | 16.63 <sup>a</sup> |                          |                               |                                 |                            |
| (R=H)                                                                             | 16.48 <sup>a</sup> | 18.89              | 0.000                    | 0.000                         | 0.000                           | 12.42(17.39) <sup>1</sup>  |
| (R=COOH)                                                                          | 17.84              | 15.52 <sup>a</sup> | 0.163                    | 0.091                         | 0.112                           | 31.45                      |
| (R=NO)                                                                            |                    | 15.46              | 0.343                    | 0.236                         | 0.156                           | 0.24(0.60) <sup>1</sup>    |
| (R=PH <sub>2</sub> )                                                              | 12.69 <sup>a</sup> | 15.45              | -0.115                   | -0.031                        | 0.163                           | 29.17(29.31) <sup>1</sup>  |
| (R=SH)                                                                            | 17.58              | 12.61 <sup>a</sup> | 0.026                    | 0.087                         | 0.034                           | 54.68(53.43) <sup>1</sup>  |
| (R=C <sub>6</sub> H <sub>5</sub> )                                                | 12.25 <sup>a</sup> | 15.83              | 0.154                    | 0.004                         | 0.058                           | -(25.27) <sup>1</sup>      |
| (R=Cl)                                                                            | 21.14              | 15.49 <sup>a</sup> | 0.240                    | 0.247                         | 0.154                           | 85.72(83.31) <sup>1</sup>  |
| (R=Br)                                                                            | 19.68              | 14.50 <sup>a</sup> | 0.191                    | 0.156                         | 0.129                           | 82.28(77.56) <sup>1</sup>  |
| (R=CH <sub>3</sub> )                                                              | 13.26 <sup>a</sup> | 18.60              | 0.121                    | 0.011                         | 0.023                           | 0.24(1.84) <sup>1</sup>    |
| (R=C <sub>2</sub> H <sub>3</sub> )                                                | 12.37 <sup>a</sup> | 18.18              | 0.102                    | 0.014                         | 0.024                           | 15.41(15.38) <sup>1</sup>  |
| (R=NH <sub>2</sub> )                                                              | 19.52              | 10.34 <sup>a</sup> | 0.232                    | 0.072                         | 0.020                           | 16.32( 17.78) <sup>1</sup> |
| (R=SiH <sub>3</sub> )                                                             |                    | 7.21 <sup>a</sup>  | -0.213                   | -0.147                        | -0.045                          | 31.61( 32.42) <sup>1</sup> |

Note that for R=NO<sub>2</sub>, the N-N cleavage (tsC1/A4) turns out to be the three-body fragmentation process, i.e., forming N<sub>2</sub>, N<sub>3</sub> and R, and is re-named as tsC1/A4\*. For R=CN and R=C<sub>2</sub>H, the N-N cleavage

(tsC1/A4) becomes the N<sub>2</sub>-extrusion and is thus re-named as tsC1/P1\*.

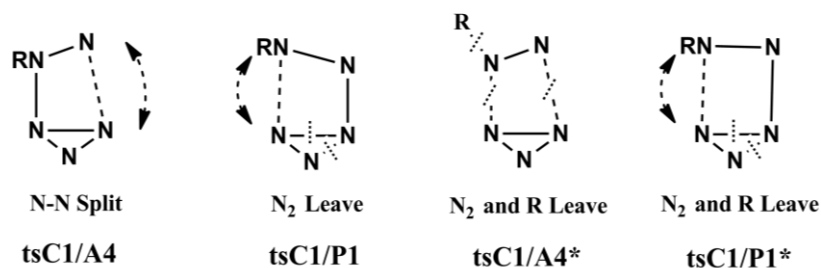

<sup>1</sup>J. C. Rienstra-Kiracofe, G. S. Tschumper, H. F. Schaefer, S. Nandi, G. B. Ellison, *Chem. Rev.*, 2002, **102**, 231.

**4. Fig. S1 The linear correlation coefficient R ( $\Delta E^{rb}$  (the rate-determining barrier) vs EN (electronegativity))**

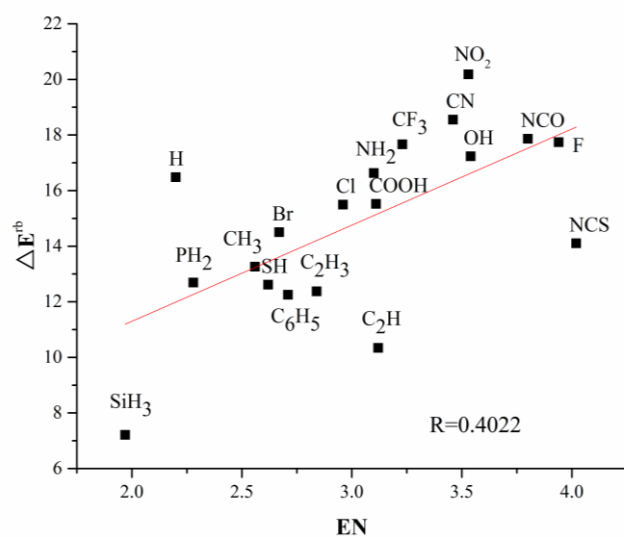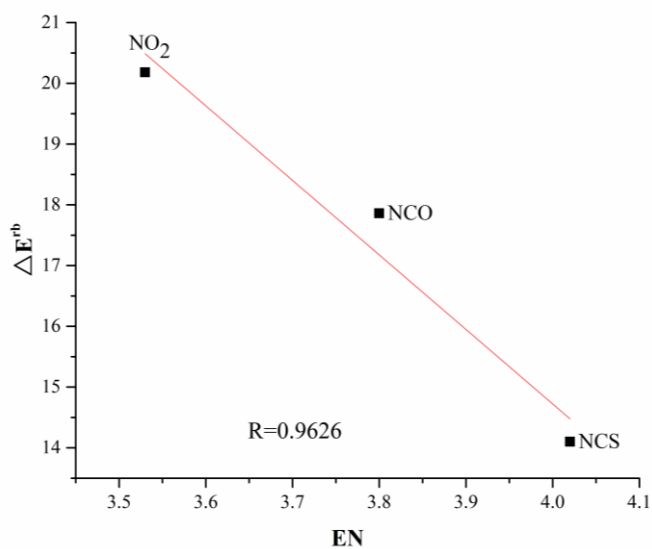

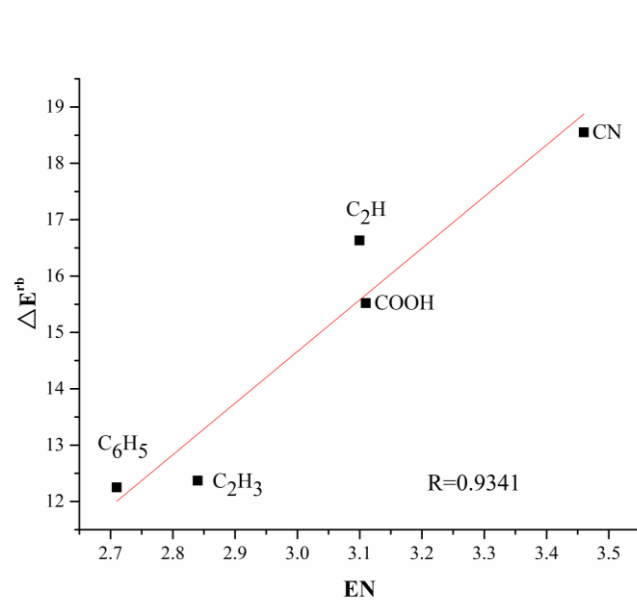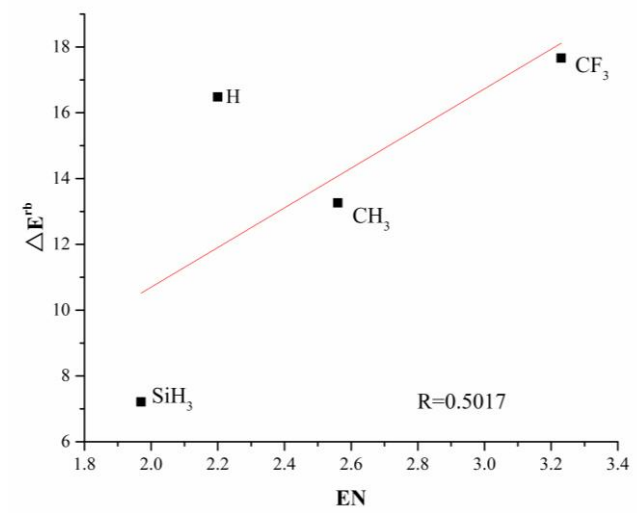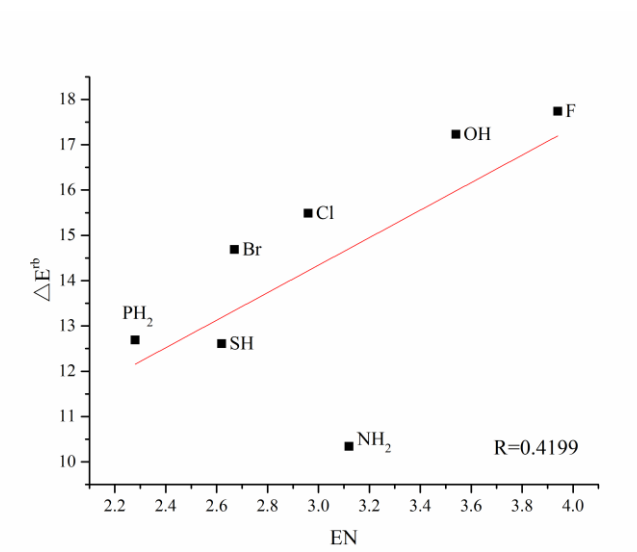





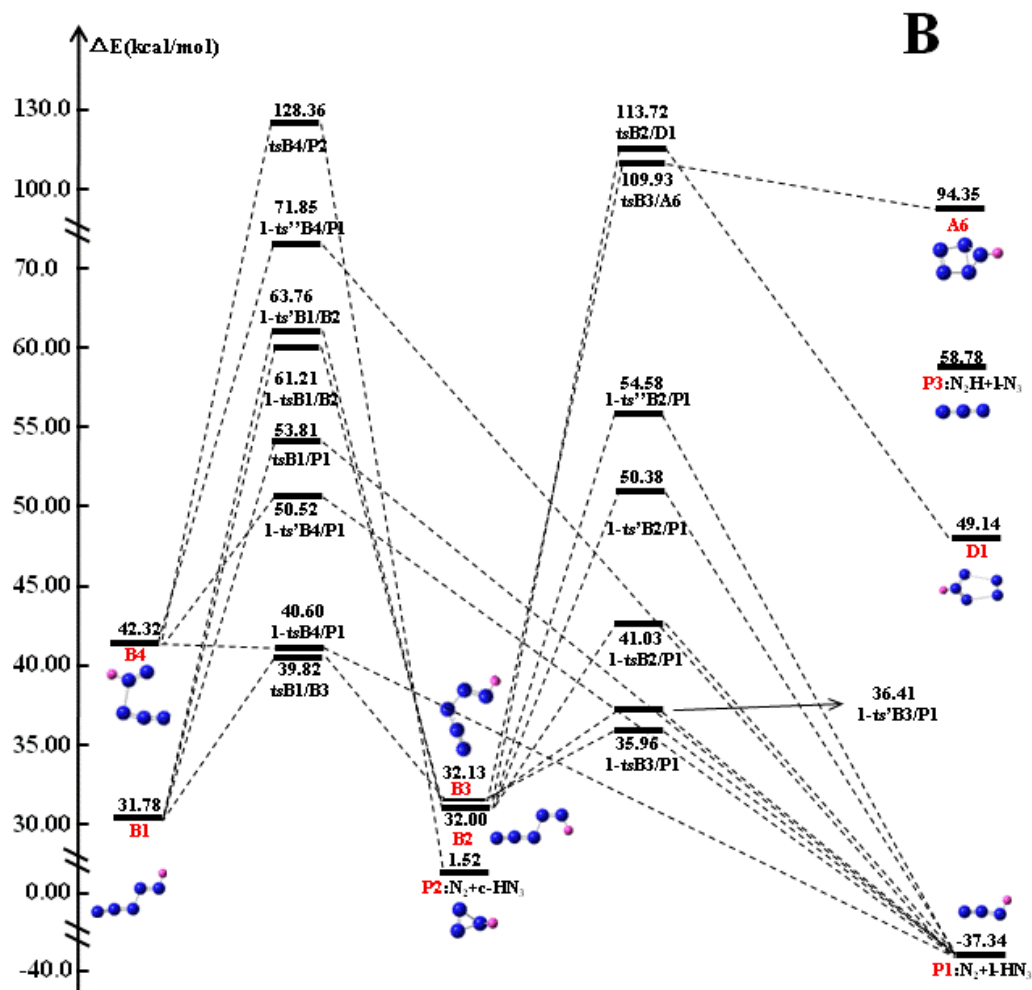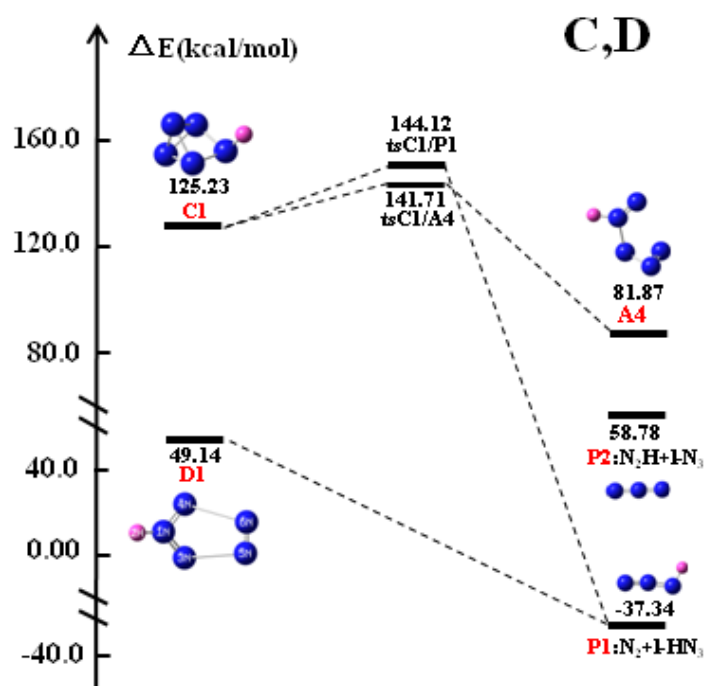

6. Fig. S3 Reference reactions for proposed synthetic routes of C1.

Route I :

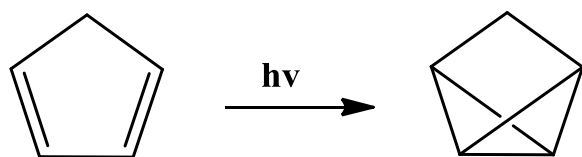

For details, see: G. D. Andrews, J. E. Baldwin, *J. Am. Chem. Soc.*, 1977, **99**, 4851.

Route II Path 1:

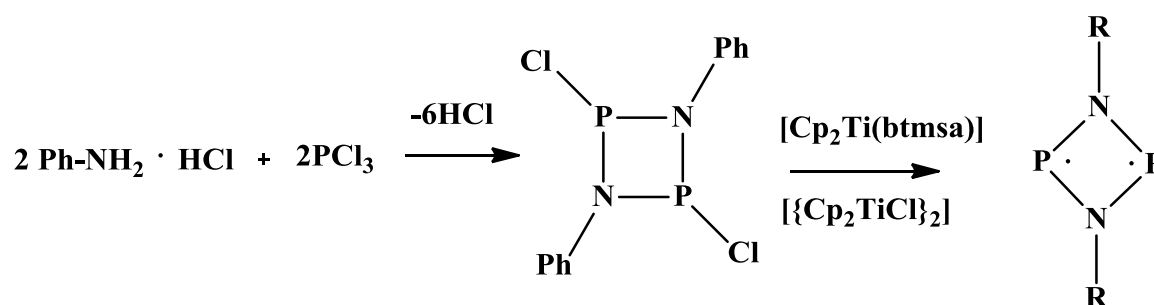

For details, see: A. Michaelis, G. Schroeter, *Ber. Dtsch. Chem. Ges.* 1894, **27**, 490.

Route II Path 2:

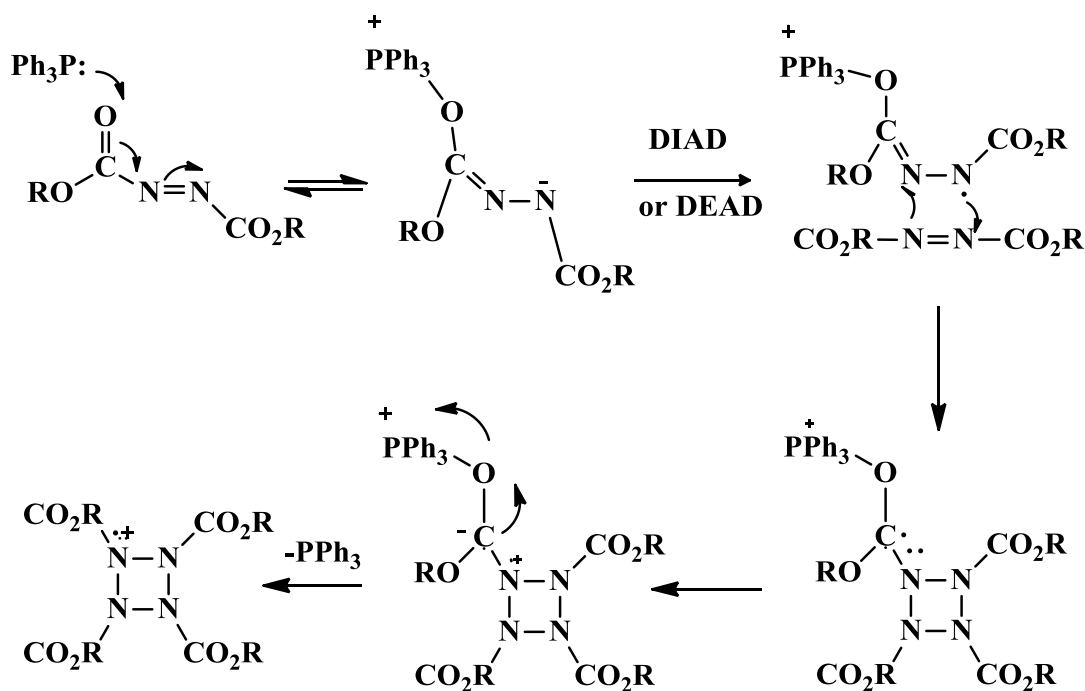

For details, see: D. Camp, M. Campitelli, G. R. Hanson and I. D. Jenkins, *J. Am. Chem. Soc.*, 2012, **134**,

### 7. Table S3 The half-life of C1 at different temperatures.

| Isomers | $t_{1/2}^{298.15\text{K}}(\text{s})$ | $t_{1/2}^{250\text{K}}(\text{s})$ | $t_{1/2}^{200\text{K}}(\text{h})$ | $t_{1/2}^{150\text{K}}(\text{h})$ | $t_{1/2}^{100\text{K}}(\text{h})$ |
|---------|--------------------------------------|-----------------------------------|-----------------------------------|-----------------------------------|-----------------------------------|
| C1      | 0.10                                 | 26.82                             | 38.33                             | $5.24 \times 10^7$                | $7.81 \times 10^{19}$             |
| C1-R    | 24.34                                | 21977.54                          | $2.19 \times 10^5$                | $7.39 \times 10^{12}$             | $6.24 \times 10^{27}$             |

We computed the rate coefficient of **C1** and **C1-NO<sub>2</sub>** at the CBS-QB3 level at four temperatures (100, 150, 200., 250 and 298.15 K). To get the half-life values of **C1** and **C1-NO<sub>2</sub>** at different temperatures, we applied the conventional transition state theory (CTST), which was described below.  $Q_{\text{TS}}$ ,  $Q_{\text{R}}$  are the partition functions of the transition state and the reactant, respectively. The other parameters are  $k_{\text{B}}$  for Boltzmann constant,  $h$  for Planck constant,  $T$  for temperature and  $R$  for universal gas constant.

$$k_{TST} = \frac{k_{\text{B}}T}{h} \frac{Q_{\text{TS}}}{Q_{\text{R}}} \exp\left[\frac{-(E_{\text{TS}} - E_{\text{R}})}{RT}\right]$$

### 8. Fig. S4 Born-Oppenheimer molecular dynamics simulation performed at different temperatures.

We carried out the Born-Oppenheimer molecular dynamics (BOMD) simulations at 500, 1000 and 2000 K for the parent **N<sub>5</sub>H-C1**. The structural evolution during the simulations was evaluated by the potential energy (PE, in hartree) of **C1** with respect to that for B3LYP/6-31G(d) optimized structures. The PE curves of **C1** at three temperatures are shown in Fig. S4. For 500 and 1000 K, the PE values have no sharp decrease during the 10 ps simulations, suggesting that the structure of **C1** is well maintained at these two temperatures. At 2000 K, the **C1** structure can be kept up to 4.5 ps. Afterwards, it undergoes an abrupt structural change to the weakly bound intermediate **A4** and then to the very stable fragments **N<sub>2</sub>+N<sub>3</sub>H**. Such an evolution trend is in good agreement with our PES study using GRRM and GPES.

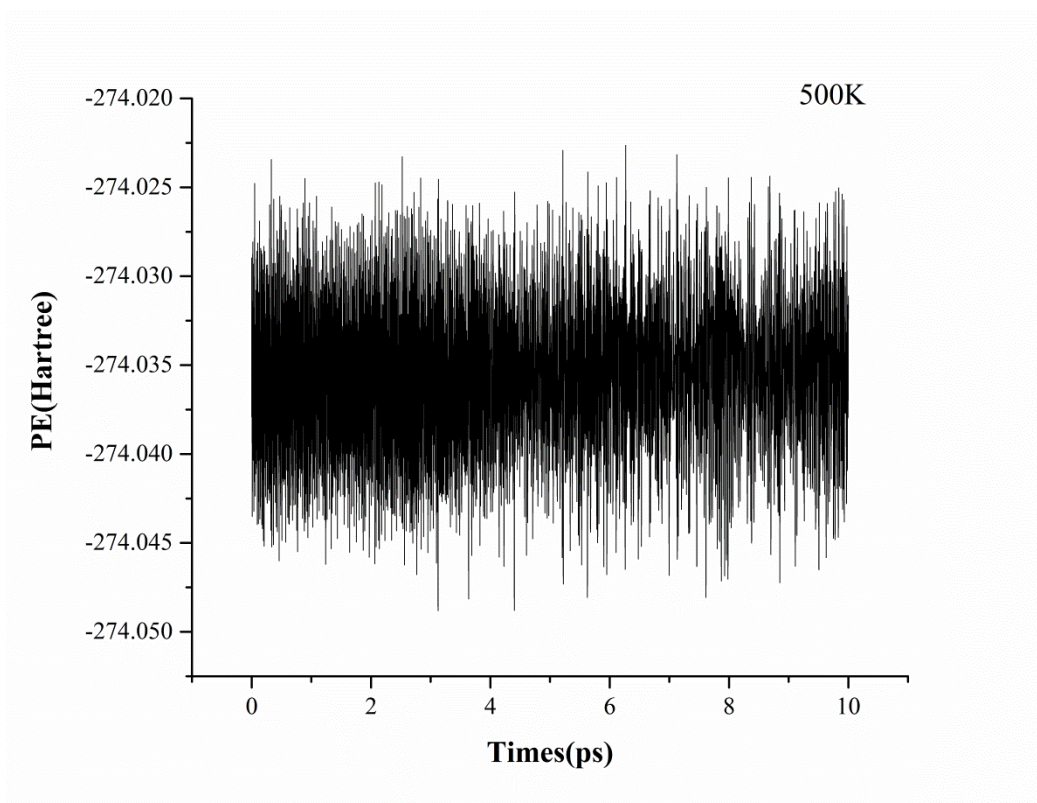

**Fig. S4 a).** Born-Oppenheimer molecular dynamics simulation at 500 K..

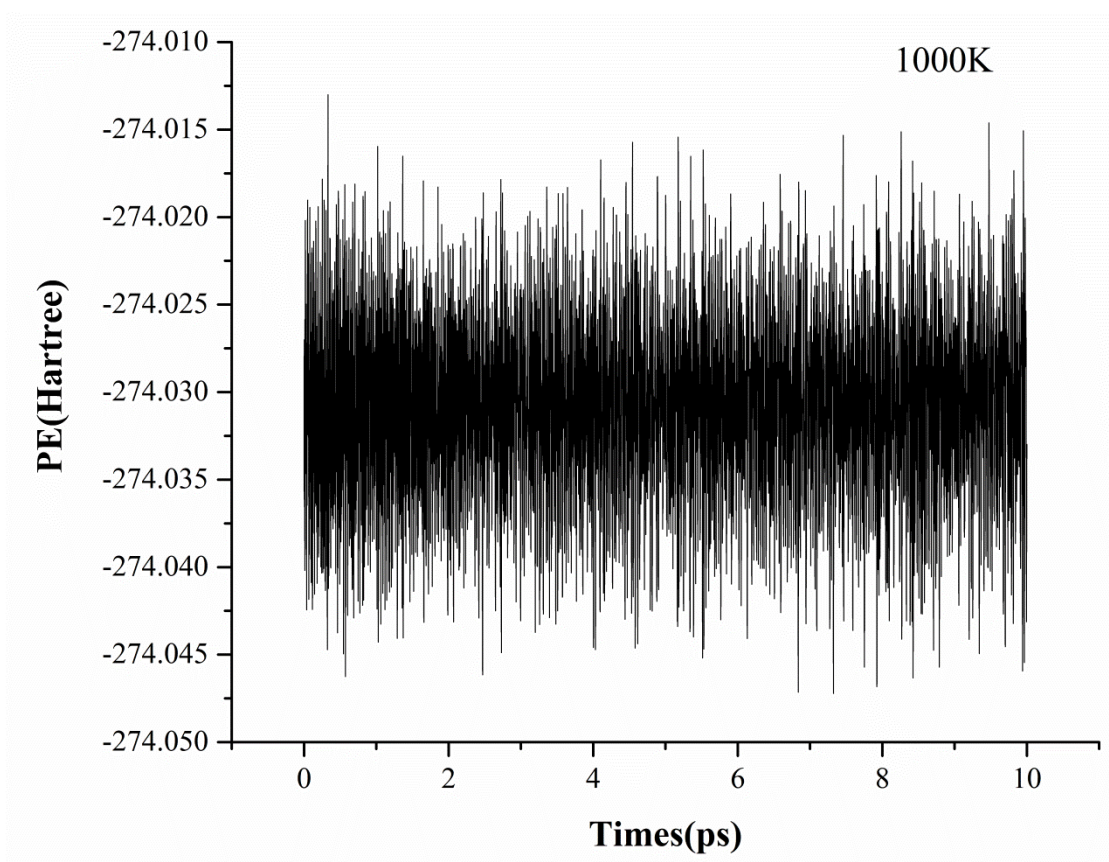

**Fig. S4 b)** Born-Oppenheimer molecular dynamics simulation at 1000 K.

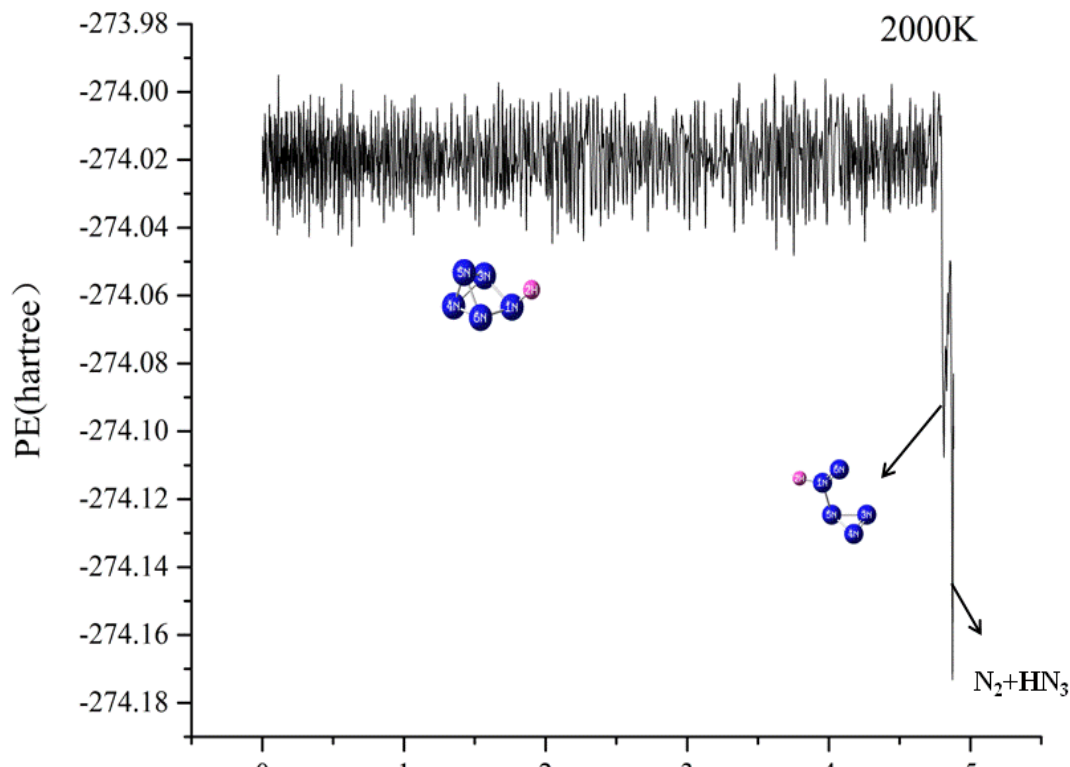

**Fig. 4S c)** Born-Oppenheimer molecular dynamics simulation performed at 1000 K.

**9. Table S4 Cartesian coordinates of the optimized isomeric structures and Transitional structure.**

```

"mol"----"Stoichiometry"
"lf"----"lowest frequency(cm-1)"
"te_zpe"----"total energy with zero-point energy (a.u.)"
"te_gfe"----"total energy with Gibbs free energy (a.u.)"
"bh_zpe"----"barrier height with zero-point energy correction (kcal/mol)"
"bh_gfe"----"barrier height with Gibbs free energy correction (kcal/mol)"

#####
A1 charge=0 spin=1 mol=H1N5 A1 CBS-QB3
lf=630.2 te_zpe=-274.294289 te_gfe=-274.320295 te_ms_zpe=-273.907132 te_ms_gfe=0.008477

7  1.018048 -0.000125 -0.000056
1  2.028893 -0.000255  0.000019
    
```

7 0.283513 -1.102422 -0.000161  
7 -0.937690 -0.677457 0.000429  
7 -0.937508 0.677685 -0.000821  
7 0.283794 1.102356 0.000607

1-tsA1/P1 charge=0 spin=1 mol=H1N5 1-tsA1/P1 CBS-QB3

lf=-601.9 te\_zpe=-274.269257 te\_gfe=-274.295914 te\_ms\_zpe=-273.876595 te\_ms\_gfe=0.003345

7 -0.390956 1.043447 -0.102126  
1 -0.676604 1.874432 0.412085  
7 -1.130202 -0.027445 0.014507  
7 -0.643487 -1.120368 0.009289  
7 1.111936 -0.667302 0.002377  
7 1.149367 0.503892 0.017083

1-ts'A1/P1 charge=0 spin=1 mol=H1N5 1-ts'A1/P1 CBS-QB3

lf=-676.9 te\_zpe=-274.194141 te\_gfe=-274.221303 te\_ms\_zpe=-273.813682 te\_ms\_gfe=-0.000933

7 -1.017358 0.060678 0.000063  
1 -1.954512 0.602142 0.000108  
7 -0.429805 1.211665 -0.000006  
7 1.333077 0.448948 -0.000097  
7 1.301871 -0.674034 -0.000064  
7 -0.908568 -1.133278 0.000089

#####

A2 charge=0 spin=1 mol=H1N5 A2 CBS-QB3

lf=140.1 te\_zpe=-274.192494 te\_gfe=-274.219843 te\_ms\_zpe=-273.805689 te\_ms\_gfe=0.001868

7 1.913092 -0.000017 0.158875  
1 2.616140 0.000058 -0.590451  
7 -0.196831 -0.000072 0.598917  
7 -1.455504 -0.590113 -0.129103  
7 -1.455502 0.590143 -0.128975  
7 0.821010 0.000050 -0.415364

1-tsA2/A3 charge=0 spin=1 mol=H1N5 1-tsA2/A3 CBS-QB3

lf=-455.5 te\_zpe=-274.135547 te\_gfe=-274.163086 te\_ms\_zpe=-273.753090 te\_ms\_gfe=-0.001958

7 2.014749 -0.107765 -0.118537  
1 2.537676 0.772857 -0.311159  
7 -0.874455 -0.747043 -0.376550  
7 -0.891702 0.794274 -0.300518  
7 -1.594840 -0.015901 0.415738  
7 0.983723 -0.033973 0.424318

1-ts'A2/A3 charge=0 spin=1 mol=H1N5 1-ts'A2/A3 CBS-QB3  
lf=-360.6 te\_zpe=-274.131675 te\_gfe=-274.159519 te\_ms\_zpe=-273.751673 te\_ms\_gfe=-0.002328

1 2.518400 -0.807661 0.412351  
7 1.021296 0.053895 -0.378253  
7 2.014448 0.090601 0.236732  
7 -1.275053 -0.081871 0.706724  
7 -1.057224 0.784735 -0.232385  
7 -1.063239 -0.731980 -0.391726

1-ts"A2/A3 charge=0 spin=1 mol=H1N5 1-ts"A2/A3 CBS-QB3  
lf=-1327.2 te\_zpe=-274.134467 te\_gfe=-274.162453 te\_ms\_zpe=-273.744774 te\_ms\_gfe=-0.002666

7 1.950690 -0.000091 0.049350  
1 2.862486 -0.000731 0.449128  
7 -1.493948 0.594328 -0.115872  
7 -0.277699 -0.000933 0.623154  
7 -1.493907 -0.594003 -0.117680  
7 0.905937 0.000803 -0.503112

1-ts"A2/A3 charge=0 spin=1 mol=H1N5 1-ts"A2/A3 CBS-QB3  
lf=-330.0 te\_zpe=-274.115098 te\_gfe=-274.143453 te\_ms\_zpe=-273.742897 te\_ms\_gfe=-0.004257

1 -2.838891 -0.553036 0.701941  
7 0.529443 -0.397244 0.008249  
7 1.415847 0.639044 0.039793  
7 -1.340925 0.442884 -0.004635  
7 -2.291077 -0.214987 -0.118261  
7 2.092268 -0.390693 -0.025423

1-tsA2/P1 charge=0 spin=1 mol=H1N5 1-tsA2/P1 CBS-QB3  
lf=-463.6 te\_zpe=-274.191902 te\_gfe=-274.219122 te\_ms\_zpe=-273.800572 te\_ms\_gfe=0.000611

7 -1.966828 0.105773 -0.000002  
1 -2.589350 -0.708196 0.000015  
7 0.092320 0.640031 -0.000014  
7 1.527823 -0.135957 -0.574620  
7 1.527823 -0.135932 0.574626  
7 -0.811231 -0.372745 0.000007

1-ts'A2/P1 charge=0 spin=1 mol=H1N5 1-ts'A2/P1 CBS-QB3  
lf=-154.8 te\_zpe=-274.184166 te\_gfe=-274.210843 te\_ms\_zpe=-273.797698 te\_ms\_gfe=0.002589

7 1.651737 0.434425 -0.001493



1 2.530681 0.199885 -0.484778  
7 -0.323082 -0.375226 0.594520  
7 -1.445343 -0.322353 -0.386344  
7 -1.157892 0.768326 0.030477  
7 0.913054 -0.533726 -0.167905

tsA2/B4 charge=0 spin=1 mol=H1N5 tsA2/B4 CBS-QB3

lf=-1391.6 te\_zpe=-274.075755 te\_gfe=-274.103289 te\_ms\_zpe=-273.685214 te\_ms\_gfe=-0.000231

7 1.742272 0.441304 0.000019  
1 2.687209 0.039767 0.000041  
7 -0.348058 -0.097725 -0.000014  
7 -1.380636 0.918531 -0.000011  
7 -1.374415 -0.718125 -0.000014  
7 0.976950 -0.549666 0.000014

#####

A3 charge=0 spin=1 mol=H1N5 A3 CBS-QB3

lf=140.0 te\_zpe=-274.193788 te\_gfe=-274.221173 te\_ms\_zpe=-273.805269 te\_ms\_gfe=0.001334

7 1.964573 -0.016535 0.000003  
1 1.921839 1.026402 -0.002883  
7 -1.456111 -0.091852 -0.591070  
7 -0.165015 0.551319 -0.001795  
7 -1.455950 -0.088034 0.591704  
7 0.837953 -0.501527 0.001571

1-tsA3/P1 charge=0 spin=1 mol=H1N5 1-tsA3/P1 CBS-QB3

lf=141.7 te\_zpe=-274.193804 te\_gfe=-274.221184 te\_ms\_zpe=-273.805294 te\_ms\_gfe=0.001325

7 -1.964594 -0.017349 0.000749  
1 -1.922626 1.025365 -0.024378  
7 1.456409 -0.074913 0.593482  
7 0.163082 0.551857 -0.014087  
7 1.456874 -0.104928 -0.588500  
7 -0.837110 -0.501149 0.011838

1-ts'A3/P1 charge=0 spin=1 mol=H1N5 1-ts'A3/P1 CBS-QB3

lf=-457.9 te\_zpe=-274.193205 te\_gfe=-274.220507 te\_ms\_zpe=-273.800455 te\_ms\_gfe=-0.000102

7 -2.000752 -0.069368 0.000011  
1 -2.037609 0.974186 -0.000074  
7 1.532836 -0.088154 0.574573  
7 0.046796 0.579522 -0.000057  
7 1.532843 -0.088263 -0.574550  
7 -0.820636 -0.472906 0.000034

tsA3/P2 charge=0 spin=1 mol=H1N5 tsA3/P2 CBS-QB3  
lf=-399.8 te\_zpe=-274.166503 te\_gfe=-274.194892 te\_ms\_zpe=-273.777716 te\_ms\_gfe=-0.004025

7 -1.960151 -0.383565 -0.000151  
1 -1.116117 -1.136223 -0.000160  
7 1.654510 0.042830 -0.601729  
7 0.306741 -0.213912 0.000106  
7 1.654640 0.042696 0.601757  
7 -1.496294 0.674268 0.000040

#####

A4 charge=0 spin=1 mol=H1N5 A4 CBS-QB3  
lf=71.0 te\_zpe=-274.167867 te\_gfe=-274.196121 te\_ms\_zpe=-273.776660 te\_ms\_gfe=-0.000493

7 1.128546 0.373829 0.012775  
1 1.622049 1.286891 0.021912  
7 -1.147740 -0.481451 -0.539212  
7 -1.243577 -0.193324 0.622382  
7 -0.500458 0.832900 -0.141412  
7 1.531507 -0.715796 0.042337

1-tsA4/P1 charge=0 spin=1 mol=H1N5 1-ts-A4/P1 CBS-QB3  
lf=-307.7 te\_zpe=-274.160925 te\_gfe=-274.187842 te\_ms\_zpe=-273.774982 te\_ms\_gfe=0.000430

7 1.237913 0.472749 0.049748  
1 2.013620 1.151811 0.094861  
7 -0.810241 -0.744238 -0.364093  
7 -1.256005 0.002781 0.582392  
7 -0.779143 0.787795 -0.342680  
7 1.319816 -0.683631 0.061081

1-ts'A4/P1 charge=0 spin=1 mol=H1N5 1-ts'A4/P1 CBS-QB3  
lf=-677.9 te\_zpe=-274.152667 te\_gfe=-274.180739 te\_ms\_zpe=-273.757789 te\_ms\_gfe=-0.002804

7 1.111546 0.279675 -0.000008  
1 1.632407 1.223908 -0.000018  
7 -1.377513 -0.296015 -0.567309  
7 -1.377507 -0.296006 0.567327  
7 -0.159454 0.941281 -0.000007  
7 1.569727 -0.803778 0.000000

1-tsA4/P2 charge=0 spin=1 mol=H1N5 1-tsA4/P2 CBS-QB3  
lf=-315.2 te\_zpe=-274.143030 te\_gfe=-274.172323 te\_ms\_zpe=-273.752076 te\_ms\_gfe=-0.006398

7 1.527912 -0.000123 0.171477  
1 1.020102 -0.000568 1.135457  
7 -1.827237 0.601550 -0.168609  
7 -1.827261 -0.601406 -0.169006  
7 -0.550614 -0.000120 0.342082  
7 2.531472 0.000179 -0.338152

1-ts'A4/P2 charge=0 spin=1 mol=H1N5 1-tsA4/P2 CBS-QB3

lf=-197.6 te\_zpe=-274.115440 te\_gfe=-274.143792 te\_ms\_zpe=-273.718570 te\_ms\_gfe=-0.003324

7 -1.196274 0.076194 0.338697  
1 -1.184648 0.277902 1.348297  
7 1.062179 -0.916323 0.112286  
7 -1.996037 -0.201673 -0.419216  
7 1.677686 0.081385 -0.173474  
7 0.621682 0.920718 -0.050907

tsA4/A5 charge=0 spin=1 mol=H1N5 tsA4/A5 CBS-QB3

lf=-175.7 te\_zpe=-274.158265 te\_gfe=-274.185611 te\_ms\_zpe=-273.766659 te\_ms\_gfe=-0.000515

7 1.073294 -0.363363 -0.094963  
1 1.056310 -1.325875 -0.495653  
7 -1.234078 0.747201 -0.085087  
7 -1.482588 -0.390655 -0.371506  
7 -0.423901 -0.237986 0.714342  
7 1.916371 0.434213 -0.091979

tsA4/C1 charge=0 spin=1 mol=H1N5 tsA4/C1 CBS-QB3

lf=-589.2 te\_zpe=-274.058018 te\_gfe=-274.084176 te\_ms\_zpe=-273.681309 te\_ms\_gfe=0.002339

7 -1.061656 -0.335096 -0.001242  
1 -1.622920 -0.841915 0.679816  
7 0.208968 -0.852583 -0.362804  
7 0.630925 0.560751 -0.521517  
7 1.089607 -0.145666 0.615782  
7 -0.635997 0.892868 0.172665

#####

A5 charge=0 spin=1 mol=H1N5 A5 CBS-QB3

lf=99.4 te\_zpe=-274.163395 te\_gfe=-274.191695 te\_ms\_zpe=-273.771595 te\_ms\_gfe=-0.001483

7 1.019968 0.277289 0.073515  
1 0.621473 1.220744 0.331541  
7 -1.389515 -0.253917 0.593894  
7 -1.450458 0.508654 -0.336582

7 -0.374330 -0.597267 -0.414902  
7 2.105552 -0.109150 0.036712

1-tsA5/P2 charge=0 spin=1 mol=1-tsA5/P2 CBS-QB3

lf=-175.7 te\_zpe=-274.158265 te\_gfe=-274.185611 te\_ms\_zpe=-273.766659 te\_ms\_gfe=-0.000515

7 1.073294 -0.363363 -0.094963  
1 1.056310 -1.325875 -0.495653  
7 -1.234078 0.747201 -0.085087  
7 -1.482588 -0.390655 -0.371506  
7 -0.423901 -0.237986 0.714342  
7 1.916371 0.434213 -0.091979

1-ts'A5/P2 charge=0 spin=1 mol=H1N5 1-tsA5/P2 CBS-QB3

lf=-554.1 te\_zpe=-274.154981 te\_gfe=-274.182939 te\_ms\_zpe=-273.761866 te\_ms\_gfe=-0.001717

7 0.977295 0.346387 0.000006  
1 0.649422 1.341872 0.000020  
7 -1.545645 0.107636 0.573915  
7 -1.545652 0.107721 -0.573881  
7 -0.060991 -0.671273 -0.000061  
7 2.082218 -0.082167 0.000018

#####

A6 charge=0 spin=1 mol=H1N5 A6 CBS-QB3

lf=485.2 te\_zpe=-274.136303 te\_gfe=-274.162424 te\_ms\_zpe=-273.756780 te\_ms\_gfe=0.005372

7 -1.106551 0.000013 -0.532756  
1 -2.047765 0.000094 -0.121888  
7 -0.327843 -0.747550 0.439395  
7 1.027119 -0.620230 -0.164228  
7 1.027281 0.619975 -0.164156  
7 -0.327469 0.747779 0.439157

tsA6/B2 charge=0 spin=1 mol=H1N5 tsA6/B2 CBS-QB3

lf=-674.7 te\_zpe=-274.122837 te\_gfe=-274.149409 te\_ms\_zpe=-273.742309 te\_ms\_gfe=0.001450

7 1.082847 -0.000001 0.500737  
1 2.099740 -0.000024 0.544818  
7 0.489123 -0.804204 -0.415850  
7 -1.180534 -0.587479 0.126563  
7 -1.180544 0.587483 0.126570  
7 0.489145 0.804205 -0.415852

tsA6/P2 charge=0 spin=1 mol=H1N5 tsA6/P2 CBS-QB3

lf=-598.5 te\_zpe=-274.116562 te\_gfe=-274.142836 te\_ms\_zpe=-273.731951 te\_ms\_gfe=0.002861

7 1.284058 -0.108737 -0.433209  
1 2.030030 0.437085 0.023532  
7 -0.088099 1.036350 0.190134  
7 -1.155473 0.334591 -0.214975  
7 -0.812617 -0.872316 -0.076136  
7 0.482127 -0.452328 0.530825

#####

A7 charge=0 spin=1 mol=H1N5 A7 CBS-QB3

lf=342.5 te\_zpe=-274.054278 te\_gfe=-274.081035 te\_ms\_zpe=-273.667184 te\_ms\_gfe=0.002209

7 -1.167340 -0.706700 -0.198819  
1 -1.369718 -1.125568 0.719712  
7 -0.041841 0.068304 0.004988  
7 1.259156 0.036298 -0.622238  
7 1.227084 -0.113958 0.633753  
7 -1.081384 0.876851 0.079500

1-tsA7/B3 charge=0 spin=1 mol=H1N5 1-tsA7/B3 CBS-QB3

lf=-446.3 te\_zpe=-274.053567 te\_gfe=-274.080256 te\_ms\_zpe=-273.667258 te\_ms\_gfe=0.001647

7 -1.187390 -0.704704 -0.233145  
1 -1.265480 -1.212045 0.658806  
7 -0.069048 0.096362 -0.051004  
7 1.211244 0.142473 -0.604101  
7 1.321461 -0.215875 0.595967  
7 -1.095484 0.854893 0.198167

1-ts'A7/B3 charge=0 spin=1 mol=H1N5 1-ts'A7/B3 CBS-QB3

lf=-444.7 te\_zpe=-274.053967 te\_gfe=-274.080663 te\_ms\_zpe=-273.667108 te\_ms\_gfe=0.001574

7 -1.168971 -0.734084 -0.159812  
1 -1.474961 -1.039377 0.774904  
7 -0.071500 0.080385 0.063567  
7 1.340780 -0.063162 -0.611693  
7 1.197675 -0.020056 0.634813  
7 -1.087276 0.885400 -0.037575

tsA7/P1 charge=0 spin=1 mol=H1N5 tsA7/P1 CBS-QB3

lf=-516.9 te\_zpe=-273.948815 te\_gfe=-273.975511 te\_ms\_zpe=-273.574817 te\_ms\_gfe=-0.000491

1 1.452939 -0.140919 -1.128407  
7 0.693659 0.541208 0.707719  
7 -0.169593 -0.326981 -0.014624  
7 -0.514184 0.875316 -0.499705  
7 1.241253 -0.559823 -0.208550  
7 -1.458697 -0.509589 0.176361

#####  
B1 charge=0 spin=1 mol=H1N5 B1 CBS-QB3  
lf=154.3 te\_zpe=-274.254708 te\_gfe=-274.281973 te\_ms\_zpe=-273.856494 te\_ms\_gfe=0.004265

7 -2.089099 0.106470 0.000075  
1 -2.746559 -0.682154 0.000238  
7 2.251738 -0.247768 0.000167  
7 1.169659 0.070541 -0.000069  
7 0.033126 0.590198 0.000044  
7 -0.973059 -0.421991 -0.000251

1-tsB1/B2 charge=0 spin=1 mol=H1N5 1-tsB1/B2 CBS-QB3  
lf=-227.6 te\_zpe=-274.207019 te\_gfe=-274.234988 te\_ms\_zpe=-273.809585 te\_ms\_gfe=-0.000454

7 1.956090 -0.072668 -0.223547  
1 2.507644 0.761274 -0.509458  
7 -1.136273 1.163322 -0.022025  
7 -1.189736 -0.010643 -0.068312  
7 -1.009627 -1.178134 -0.058386  
7 1.021311 -0.010631 0.445050

1-ts'B1/B2 charge=0 spin=1 mol=H1N5 1-ts'B1/B2 CBS-QB3  
lf=-1042.5 te\_zpe=-274.210801 te\_gfe=-274.239138 te\_ms\_zpe=-273.805528 te\_ms\_gfe=-0.000818

7 -2.159243 -0.038462 -0.000005  
1 -3.119791 0.244171 0.000026  
7 0.213455 0.781707 0.000000  
7 1.262080 0.166833 0.000001  
7 2.249294 -0.418468 0.000000  
7 -1.119901 -0.526491 0.000001

tsB1/B3 charge=0 spin=1 mol=H1N5 tsB1/B3 CBS-QB3  
lf=-182.2 te\_zpe=-274.241405 te\_gfe=-274.268374 te\_ms\_zpe=-273.843670 te\_ms\_gfe=0.003816

7 1.696132 -0.534975 -0.277743  
1 2.549682 -0.800604 0.237673  
7 -2.026743 -0.516057 0.091214  
7 -1.070797 0.079701 -0.048265  
7 -0.092893 0.808275 -0.237738  
7 1.130061 0.277428 0.438578

tsB1/P1 charge=0 spin=1 mol=H1N5 B1-ts-B1-P1 CBS-QB3  
lf=-846.5 te\_zpe=-274.225594 te\_gfe=-274.252943 te\_ms\_zpe=-273.821376 te\_ms\_gfe=0.001237

7 2.224168 0.106205 0.000002  
1 2.780645 -0.752836 0.000028  
7 -2.406957 -0.032356 -0.000008  
7 -1.305578 -0.196865 0.000003  
7 0.066553 0.530569 -0.000013  
7 1.024578 -0.300004 0.000012

#####

B2 charge=0 spin=1 mol=H1N5 B2 CBS-QB3

lf=139.5 te\_zpe=-274.256386 te\_gfe=-274.283841 te\_ms\_zpe=-273.856131 te\_ms\_gfe=0.003384

7 -2.132609 -0.087091 0.000051  
1 -2.177899 0.948911 0.000122  
7 0.015368 0.578584 -0.000054  
7 1.167136 0.103919 0.000001  
7 2.245462 -0.229161 0.000041  
7 -0.984228 -0.501810 -0.000057

1-tsB2/P1 charge=0 spin=1 mol=H1N5 1-tsB2/P1 CBS-QB3

lf=-168.0 te\_zpe=-274.240548 te\_gfe=-274.267706 te\_ms\_zpe=-273.841742 te\_ms\_gfe=0.002638

7 1.676895 -0.661939 0.083117  
1 1.112005 -1.089547 0.841906  
7 -0.091165 0.885691 0.272465  
7 -1.030170 0.116040 0.048270  
7 -1.940213 -0.539825 -0.140212  
7 1.225795 0.355682 -0.383912

1-ts'B2/P1 charge=0 spin=1 mol=H1N5 1-ts'B2/P1 CBS-QB3

lf=-356.1 te\_zpe=-274.231365 te\_gfe=-274.259832 te\_ms\_zpe=-273.826846 te\_ms\_gfe=-0.001658

7 -2.181872 -0.336461 0.000391  
1 -1.428474 -1.127628 0.000362  
7 0.198346 -0.294216 -0.000644  
7 1.386621 -0.070231 -0.000105  
7 2.513781 0.158035 0.000409  
7 -1.712808 0.703962 -0.000102

1-ts"B2/P1 charge=0 spin=1 mol=H1N5 1-ts"B2/P1 CBS-QB3

lf=-706.3 te\_zpe=-274.223252 te\_gfe=-274.250981 te\_ms\_zpe=-273.820147 te\_ms\_gfe=-0.000295

7 -2.264481 -0.086233 0.000008  
1 -2.360476 0.948070 0.000073  
7 -0.139117 0.506748 0.000033

7 1.338011 -0.165901 -0.000018  
7 2.431916 0.004476 -0.000015  
7 -1.029119 -0.394528 -0.000018

tsB2/D1 charge=0 spin=1 mol=H1N5 tsB2/D1 CBS-QB3

lf=-886.8 te\_zpe=-274.097799 te\_gfe=-274.125256 te\_ms\_zpe=-273.702576 te\_ms\_gfe=0.000393

7 1.186256 -0.380691 -0.504651  
1 1.820367 -1.116618 -0.142653  
7 1.394971 0.831558 0.109073  
7 0.138108 -0.428351 0.581637  
7 -0.971439 -0.080825 0.068098  
7 -2.007949 0.217825 -0.233778

#####

B3 charge=0 spin=1 mol=H1N5 B3 CBS-QB3

lf=162.6 te\_zpe=-274.252259 te\_gfe=-274.279810 te\_ms\_zpe=-273.855636 te\_ms\_gfe=0.003630

7 1.301085 -0.816661 -0.000240  
1 2.299289 -1.051492 0.000115  
7 1.256710 0.422599 0.000032  
7 -0.044142 0.977453 0.000095  
7 -0.973021 0.123134 0.000150  
7 -1.869101 -0.556312 -0.000053

1-tsB3/P1 charge=0 spin=1 mol=H1N5 1-tsB3/P1 CBS-QB3

lf=-272.1 te\_zpe=-274.247951 te\_gfe=-274.274578 te\_ms\_zpe=-273.849833 te\_ms\_gfe=0.003525

7 -1.052636 -0.825510 0.000079  
1 -1.997746 -1.216485 0.000122  
7 -1.134037 0.401633 -0.000016  
7 0.068922 1.144639 -0.000090  
7 1.033615 0.269289 -0.000035  
7 1.369528 -0.816268 0.000045

1-ts'B3/P1 charge=0 spin=1 mol=H1N5 1-ts'B3/P1 CBS-QB3

lf=-685.6 te\_zpe=-274.248607 te\_gfe=-274.276017 te\_ms\_zpe=-273.849108 te\_ms\_gfe=0.001964

7 -1.397036 -0.795799 0.000038  
1 -2.406044 -0.964649 0.000043  
7 -1.231148 0.447322 -0.000031  
7 -0.036415 0.939547 -0.000054  
7 0.971969 -0.060698 0.000008  
7 2.036351 -0.392565 0.000033

tsB3/A6 charge=0 spin=1 mol=H1N5 tsB3/A6 CBS-QB3

lf=-598.5 te\_zpe=-274.116562 te\_gfe=-274.142836 te\_ms\_zpe=-273.731951 te\_ms\_gfe=0.002861



7 1.284058 -0.108737 -0.433209  
1 2.030030 0.437085 0.023532  
7 -0.088099 1.036350 0.190134  
7 -1.155473 0.334591 -0.214975  
7 -0.812617 -0.872316 -0.076136  
7 0.482127 -0.452328 0.530825

#####

B4 charge=0 spin=1 mol=H1N5 B4 CBS-QB3

lf=89.1 te\_zpe=-274.239667 te\_gfe=-274.267793 te\_ms\_zpe=-273.839687 te\_ms\_gfe=0.001873

7 -1.275004 0.228228 0.000053  
1 -1.943312 1.008517 0.000075  
7 0.348777 1.192451 0.000040  
7 1.046816 0.203490 -0.000020  
7 1.494688 -0.855563 -0.000069  
7 -1.337661 -0.912680 -0.000014

1-tsB4/P1 charge=0 spin=1 mol=H1N5 1-tsB4/P1 CBS-QB3

lf=-190.7 te\_zpe=-274.237619 te\_gfe=-274.264674 te\_ms\_zpe=-273.842427 te\_ms\_gfe=0.002233

7 1.193368 -0.529065 0.000083  
1 1.973009 -1.194813 0.000139  
7 -0.944108 -1.135654 -0.000056  
7 -1.060345 0.034107 -0.000071  
7 -0.725158 1.175726 -0.000056  
7 1.254384 0.625574 0.000080

1-ts'B4/P1 charge=0 spin=1 mol=H1N5 1-ts'B4/P1 CBS-QB3

lf=-118.4 te\_zpe=-274.229278 te\_gfe=-274.256908 te\_ms\_zpe=-273.826628 te\_ms\_gfe=0.001429

7 -1.269802 -0.032189 0.348687  
1 -1.176176 0.010912 1.376536  
7 0.266735 0.920881 -0.134688  
7 1.182724 0.119801 -0.056492  
7 2.066718 -0.609303 0.009828  
7 -2.078349 -0.400748 -0.363983

1-ts"B4/P1 charge=0 spin=1 mol=H1N5 1-ts"B4/P1 CBS-QB3

lf=-566.0 te\_zpe=-274.181141 te\_gfe=-274.209110 te\_ms\_zpe=-273.792635 te\_ms\_gfe=-0.001442

7 1.211632 0.191937 0.000001  
1 1.964436 0.965491 0.000002  
7 0.217998 1.058441 0.000001

7 -1.015476 -0.171645 -0.000001  
7 -2.120387 -0.232918 -0.000001  
7 1.425598 -0.983742 -0.000001

tsB4/P2 charge=0 spin=1 mol=H1N5 tsB4/P2 CBS-QB3

lf=-886.8 te\_zpe=-274.097799 te\_gfe=-274.125256 te\_ms\_zpe=-273.702576 te\_ms\_gfe=0.000393

7 1.186256 -0.380691 -0.504651  
1 1.820367 -1.116618 -0.142653  
7 1.394971 0.831558 0.109073  
7 0.138108 -0.428351 0.581637  
7 -0.971439 -0.080825 0.068098  
7 -2.007949 0.217825 -0.233778

#####

C1 charge=0 spin=1 mol=H1N5 C1 CBS-QB3

lf=615.6 te\_zpe=-274.083530 te\_gfe=-274.109479 te\_ms\_zpe=-273.707570 te\_ms\_gfe=0.005425

7 -1.183977 -0.000001 -0.135609  
1 -1.694433 -0.000030 0.756122  
7 -0.079983 -0.968320 -0.021207  
7 0.818382 0.000029 -0.682115  
7 0.767630 -0.000033 0.752071  
7 -0.079990 0.968329 -0.021158

tsC1/A4 charge=0 spin=1 mol=H1N5 tsC1/A4 CBS-QB3

lf=-589.2 te\_zpe=-274.058018 te\_gfe=-274.084176 te\_ms\_zpe=-273.681309 te\_ms\_gfe=0.002339

7 -1.061656 -0.335096 -0.001242  
1 -1.622920 -0.841915 0.679816  
7 0.208968 -0.852583 -0.362804  
7 0.630925 0.560751 -0.521517  
7 1.089607 -0.145666 0.615782  
7 -0.635997 0.892868 0.172665

tsC1/P1 charge=0 spin=1 mol=H1N5 tsC1/P1 CBS-QB3

lf=-670.7 te\_zpe=-274.052164 te\_gfe=-274.078249 te\_ms\_zpe=-273.677463 te\_ms\_gfe=0.002019

7 1.071954 -0.450529 -0.175545  
1 1.890728 -0.448076 0.457228  
7 0.577023 0.867827 -0.233279  
7 -1.052499 -0.204678 -0.589685  
7 -0.555094 0.650622 0.536444  
7 -0.311487 -0.799231 0.396747

#####

D1 charge=0 spin=1 mol=H1N5 D1 CBS-QB3

lf=21.6 te\_zpe=-274.206246 te\_gfe=-274.239887 te\_ms\_zpe=-273.828824 te\_ms\_gfe=-0.007213

7 -1.465050 -0.001411 0.416740  
1 -1.877391 -0.005727 1.367660  
7 -1.129576 -0.937790 -0.356513  
7 -1.127927 0.941979 -0.347294  
7 1.992197 -0.549000 0.050764  
7 1.998555 0.547040 0.040923

tsD1/A4 charge=0 spin=1 mol=H1N5 tsD1/A4 CBS-QB3

lf=-608.7 te\_zpe=-274.110403 te\_gfe=-274.136691 te\_ms\_zpe=-273.725912 te\_ms\_gfe=0.002269

7 -1.378523 0.033667 0.279171  
1 -1.228605 -0.421710 1.198448  
7 -0.494527 -0.378080 -0.587143  
7 0.147401 1.049351 -0.167879  
7 0.744948 -0.914618 0.055087  
7 1.156216 0.269924 0.249556

tableS2. Cartesian coordinates of the optimized isomeric structures and Transitional structure of the substituted 3D-N5H(C1).

"mol"----"Stoichiometry"

"lf"----"lowest frequency(cm<sup>-1</sup>)"

"te\_zpe"----"total energy with zero-point energy (a.u.)"

"te\_gfe"----"total energy with Gibbs free energy (a.u.)"

"bh\_zpe"----"barrier height with zero-point energy correction (kcal mol<sup>-1</sup>)"

"bh\_gfe"----"barrier height with Gibbs free energy correction (kcal mol<sup>-1</sup>)"

#####

R-Br-opt charge=0 spin=1 mol=Br1N5 R-Br-opt CBS-QB3

lf=198.6 te\_zpe=-2847.606600 te\_gfe=-2847.636240 te\_ms\_zpe=-2845.967931 te\_ms\_gfe=-0.009740

7 0.390984 0.000001 -0.774183  
7 1.270283 -0.974132 -0.107475  
7 2.384009 0.000000 -0.254914  
7 1.635677 -0.000003 0.962675  
7 1.270285 0.974135 -0.107471  
35 -1.390247 0.000000 0.056274

R-Br-TS charge=0 spin=1 mol=Br1N5 R-Br-TS CBS-QB3

lf=-607.2 te\_zpe=-2847.583903 te\_gfe=-2847.613844 te\_ms\_zpe=-2845.944528 te\_ms\_gfe=-0.012461

7 -0.394847 -0.277987 -0.620421  
7 -1.040076 0.947081 -0.352218  
7 -2.506987 -0.250128 -0.345371  
7 -1.833846 0.534473 0.717178  
7 -1.529941 -0.876423 0.347651

35 1.461139 -0.015403 0.050636

#####

R-C2H3-opt charge=0 spin=1 mol=C2H3N5 R-C2H3-opt CBS-QB3

lf=71.0 te\_zpe=-351.465443 te\_gfe=-351.495237 te\_ms\_zpe=-350.951152 te\_ms\_gfe=0.033231

7 -0.275498 -0.504972 0.003902  
7 0.781565 -0.099530 0.972703  
7 1.816094 -0.503562 0.003338  
7 1.393998 0.864369 -0.006398  
7 0.781055 -0.113495 -0.971207  
6 -1.389811 0.392335 -0.002237  
1 -1.181447 1.460596 -0.009013  
6 -2.617282 -0.111009 0.000479  
1 -3.486375 0.535167 -0.004127  
1 -2.770121 -1.183387 0.007325

R-C2H3-TS charge=0 spin=1 mol=C2H3N5 R-C2H3-TS CBS-QB3

lf=-476.0 te\_zpe=-351.446810 te\_gfe=-351.476440 te\_ms\_zpe=-350.931435 te\_ms\_gfe=0.031997

7 -0.184027 0.420860 -0.332209  
7 0.534240 -0.810075 -0.444671  
7 1.762638 0.010369 -0.354812  
7 1.350373 -0.708686 0.811005  
7 0.893858 1.070031 0.118825  
6 -1.495916 0.522981 0.130619  
1 -1.713436 1.505044 0.533533  
6 -2.382400 -0.463736 0.023128  
1 -3.395741 -0.318301 0.369176  
1 -2.120502 -1.419708 -0.412156

#####

R-C2H-opt charge=0 spin=1 mol=C2H1N5 R-C2H-opt CBS-QB3

lf=161.3 te\_zpe=-350.220984 te\_gfe=-350.250015 te\_ms\_zpe=-349.708165 te\_ms\_gfe=0.010071

7 -0.261480 0.000073 -0.676495  
7 0.711141 -0.974978 -0.080576  
7 1.796616 0.000007 -0.292410  
7 1.119342 -0.000089 0.975270  
7 0.711173 0.974989 -0.080413  
6 -1.501538 0.000040 -0.140505  
6 -2.646454 -0.000014 0.225044  
1 -3.649581 -0.000167 0.575132

R-C2H-TS charge=0 spin=1 mol=C2H1N5 R-C2H-TS CBS-QB3

lf=-535.2 te\_zpe=-350.195672 te\_gfe=-350.224967 te\_ms\_zpe=-349.681658 te\_ms\_gfe=0.007865

7 -0.283063 0.255254 -0.313248  
7 0.734810 -0.767443 -0.551875  
7 1.714629 0.297968 -0.268231  
7 1.441091 -0.703180 0.732695  
7 0.615756 1.063100 0.268462  
6 -1.561455 0.035890 -0.034654  
6 -2.737662 -0.150440 0.135077  
1 -3.767865 -0.332599 0.322832

#####

R-C6H5-opt charge=0 spin=1 mol=C6H5N5 R-C6H5-opt CBS-QB3

lf=27.4 te\_zpe=-505.109320 te\_gfe=-505.143452 te\_ms\_zpe=-504.326522 te\_ms\_gfe=0.076909

7 1.049326 -0.421318 -0.634630  
7 1.891824 -0.880371 0.503218  
7 3.026793 -0.129825 -0.063031  
7 2.203339 0.532407 0.906820  
7 1.947176 0.742920 -0.560153  
6 -0.319526 -0.163955 -0.300055  
6 -1.156371 -1.274662 -0.169041  
6 -0.827099 1.128849 -0.176185  
6 -2.503003 -1.086129 0.115445  
1 -0.744961 -2.269434 -0.291953  
6 -2.186558 1.304282 0.077250  
1 -0.173412 1.984283 -0.287167  
6 -3.023425 0.203372 0.232888  
1 -3.151365 -1.947032 0.229387  
1 -2.586109 2.308111 0.162924  
1 -4.077472 0.346833 0.439427

R-C6H5-TS charge=0 spin=1 mol=C6H5N5 R-C6H5-TS CBS-QB3

lf=-485.8 te\_zpe=-505.090848 te\_gfe=-505.125115 te\_ms\_zpe=-504.306997 te\_ms\_gfe=0.075294

7 1.031343 0.094342 -0.532441  
7 1.930418 -0.936618 -0.121748  
7 2.991010 0.092690 -0.180233  
7 2.490196 -0.272967 1.107166  
7 1.905310 1.053910 -0.207001  
6 -0.349070 0.049920 -0.254929  
6 -0.989014 -1.190087 -0.227130  
6 -1.055775 1.239308 -0.065442  
6 -2.357773 -1.233530 0.016736  
1 -0.419547 -2.096639 -0.388165

6 -2.421691 1.173578 0.180887  
1 -0.535885 2.188294 -0.095197  
6 -3.076890 -0.057606 0.220802  
1 -2.861794 -2.192209 0.046449  
1 -2.976285 2.090225 0.343113  
1 -4.143141 -0.098656 0.408057

#####

R-CF3-opt charge=0 spin=1 mol=C1F3N5 R-CF3-opt CBS-QB3  
lf=57.3 te\_zpe=-611.207163 te\_gfe=-611.239098 te\_ms\_zpe=-610.452528 te\_ms\_gfe=0.003455

7 0.224679 0.000000 -0.700365  
7 1.195055 -0.973568 -0.171697  
7 2.274060 0.000000 -0.449559  
7 1.697284 -0.000002 0.858373  
7 1.195054 0.973569 -0.171695  
6 -1.059001 0.000000 -0.022224  
9 -0.986720 -0.000009 1.318578  
9 -1.714910 1.092743 -0.404952  
9 -1.714918 -1.092733 -0.404966

R-CF3-TS charge=0 spin=1 mol=C1F3N5 R-CF3-TS CBS-QB3  
lf=-631.1 te\_zpe=-611.179115 te\_gfe=-611.211508 te\_ms\_zpe=-610.424380 te\_ms\_gfe=0.000253

7 0.250176 0.305197 -0.471159  
7 1.220808 -0.745287 -0.584161  
7 2.244057 0.298087 -0.285296  
7 1.918288 -0.601819 0.721261  
7 1.057322 1.179163 0.070218  
6 -1.090024 -0.015975 0.006320  
9 -1.043774 -0.717510 1.133897  
9 -1.735864 1.121932 0.218684  
9 -1.697519 -0.732372 -0.929688

#####

R-CH3-opt charge=0 spin=1 mol=C1H3N5 R-CH3-opt CBS-QB3  
lf=204.8 te\_zpe=-313.383126 te\_gfe=-313.411034 te\_ms\_zpe=-312.936590 te\_ms\_gfe=0.030658

7 0.613816 0.000043 -0.606497  
7 -0.382193 0.969866 -0.112586  
7 -1.454191 0.000024 -0.401385  
7 -0.899104 -0.000067 0.919412  
7 -0.382180 -0.969846 -0.112704  
6 1.840702 -0.000010 0.187130  
1 2.410403 0.885833 -0.097226

1 1.662015 -0.000029 1.268033  
1 2.410338 -0.885883 -0.097264

R-CH3-TS charge=0 spin=1 mol=C1H3N5 R-CH3-TS CBS-QB3

lf=-471.3 te\_zpe=-313.362916 te\_gfe=-313.391094 te\_ms\_zpe=-312.915455 te\_ms\_gfe=0.028560

7 -0.601364 0.252396 -0.367888  
7 0.410237 -0.720572 -0.605897  
7 1.384344 0.335336 -0.257703  
7 1.124844 -0.671357 0.715505  
7 0.226769 1.079575 0.243105  
6 -1.877244 -0.180433 0.170097  
1 -2.398311 -0.749194 -0.598833  
1 -1.694245 -0.798919 1.056489  
1 -2.457793 0.703066 0.431907

#####

R-Cl-opt charge=0 spin=1 mol=C11N5 R-Cl-opt CBS-QB3

lf=239.4 te\_zpe=-733.682945 te\_gfe=-733.711406 te\_ms\_zpe=-732.837416 te\_ms\_gfe=-0.008088

7 -0.181869 0.000000 -0.728688  
7 0.734773 -0.975007 -0.102826  
7 1.834506 0.000000 -0.305082  
7 1.146680 -0.000002 0.949187  
7 0.734774 0.975008 -0.102823  
17 -1.757767 0.000000 0.119507

R-Cl-TS charge=0 spin=1 mol=C11N5 R-Cl-TS CBS-QB3

lf=-628.2 te\_zpe=-733.658417 te\_gfe=-733.687186 te\_ms\_zpe=-732.812733 te\_ms\_gfe=-0.010918

7 0.207758 -0.287838 -0.570982  
7 -0.474266 0.943813 -0.341000  
7 -1.923919 -0.253237 -0.396735  
7 -1.309640 0.549682 0.694352  
7 -1.011182 -0.874695 0.361921  
17 1.857573 -0.032004 0.103948

#####

R-CN-opt charge=0 spin=1 mol=C1N6 R-CN-opt CBS-QB3

lf=163.3 te\_zpe=-366.320710 te\_gfe=-366.349597 te\_ms\_zpe=-365.800726 te\_ms\_gfe=-0.000322

7 0.296004 0.000192 -0.662395  
7 -0.679273 0.975126 -0.084320  
7 -1.760847 0.000056 -0.319017

7 -1.110160 -0.000251 0.962776  
7 -0.679225 -0.975122 -0.084784  
6 1.529888 0.000199 -0.102556  
7 2.622169 -0.000171 0.275645

R-CN-TS charge=0 spin=1 mol=C1N6 R-CN-TS CBS-QB3

lf=-763.3 te\_zpe=-366.292388 te\_gfe=-366.321782 te\_ms\_zpe=-365.771165 te\_ms\_gfe=-0.003750

7 0.363778 -0.223755 -0.499650  
7 -0.447562 0.961354 -0.288539  
7 -1.841357 -0.251834 -0.424813  
7 -1.266307 0.504278 0.721984  
7 -0.951496 -0.903599 0.336030  
6 1.628279 -0.066969 -0.081923  
7 2.747277 -0.029042 0.225209

#####

R-COOH-opt charge=0 spin=1 mol=C1H1N5O2 R-COOH-opt CBS-QB3

lf=87.1 te\_zpe=-462.689982 te\_gfe=-462.720716 te\_ms\_zpe=-462.062900 te\_ms\_gfe=0.014698

7 0.036826 -0.005896 -0.631281  
7 0.961437 -0.989112 -0.040389  
7 2.079888 -0.072538 -0.339870  
7 1.462128 0.026316 0.949478  
7 1.034103 0.956670 -0.150999  
6 -1.263084 0.126964 -0.076495  
8 -1.778998 1.184831 0.136760  
8 -1.811119 -1.086561 0.061472  
1 -2.721217 -0.956025 0.364546

R-COOH-TS charge=0 spin=1 mol=C1H1N5O2 R-COOH-TS CBS-QB3

lf=-486.9 te\_zpe=-462.665790 te\_gfe=-462.696900 te\_ms\_zpe=-462.038172 te\_ms\_gfe=0.011802

7 0.037157 0.129396 -0.412063  
7 0.922361 1.097867 -0.241336  
7 1.721771 -0.369088 0.960242  
7 2.018562 0.163174 -0.353957  
7 1.027165 -0.913027 -0.194082  
6 -1.320692 0.114245 -0.013828  
8 -1.776957 -1.134136 -0.126879  
1 -2.706329 -1.129973 0.143755  
8 -1.905371 1.094916 0.330327

#####

R-F-opt charge=0 spin=1 mol=F1N5 R-F-opt CBS-QB3



lf=297.2 te\_zpe=-373.299677 te\_gfe=-373.327106 te\_ms\_zpe=-372.820100 te\_ms\_gfe=-0.005595

7 -0.733910 0.526271 0.000000  
7 -0.044805 -0.335608 0.978085  
7 -0.154265 -1.445867 0.000000  
7 1.035392 -0.658812 0.000000  
7 -0.044805 -0.335608 -0.978085  
9 -0.044805 1.749708 0.000000

R-F-TS charge=0 spin=1 mol=F1N5 R-F-TS CBS-QB3

lf=-622.8 te\_zpe=-373.271157 te\_gfe=-373.298903 te\_ms\_zpe=-372.791835 te\_ms\_gfe=-0.008459

7 0.672564 -0.315578 -0.473498  
7 -0.021296 0.934080 -0.318135  
7 -1.453505 -0.260698 -0.486492  
7 -0.954169 0.585009 0.637351  
7 -0.659536 -0.859929 0.390511  
9 1.879066 -0.064465 0.194649

#####

R-NCO-opt charge=0 spin=1 mol=C1N6O1 R-NCO-opt CBS-QB3

lf=44.1 te\_zpe=-441.569611 te\_gfe=-441.600865 te\_ms\_zpe=-440.951924 te\_ms\_gfe=0.002042

7 0.135835 0.000407 -0.543456  
7 1.174146 -0.974526 -0.096985  
7 2.214779 0.000383 -0.480789  
7 1.748992 -0.001153 0.875478  
7 1.174518 0.975185 -0.095238  
7 -0.923572 -0.000700 0.381453  
6 -2.105341 0.000655 0.054569  
8 -3.255106 -0.000138 -0.076332

R-NCO-TS charge=0 spin=1 mol=C1N6O1 R-NCO-TS CBS-QB3

lf=-650.2 te\_zpe=-441.541208 te\_gfe=-441.572618 te\_ms\_zpe=-440.923452 te\_ms\_gfe=-0.001032

7 -0.302697 0.945432 0.226288  
7 -0.649457 -0.316352 0.902086  
7 -2.256734 -0.076826 0.122447  
7 -1.180728 -1.047632 -0.154579  
7 -1.458993 0.236847 -0.895610  
7 1.035858 0.946735 0.023693  
6 1.874010 0.042437 -0.058002  
8 2.805649 -0.634006 -0.152782

#####

R-NH2-opt charge=0 spin=1 mol=H2N6 R-NH2-opt CBS-QB3

lf=-286.8 te\_zpe=-329.421367 te\_gfe=-329.448982 te\_ms\_zpe=-328.965398 te\_ms\_gfe=0.019634

7 0.667454 -0.015953 -0.582097  
7 -0.376129 0.983772 -0.114533  
7 -1.422156 0.004785 -0.425668  
7 -0.896420 0.005081 0.904792  
7 -0.369432 -0.975380 -0.097929  
7 1.789485 -0.082694 0.190036  
1 2.570791 0.350732 -0.280500  
1 1.679593 0.211995 1.158290

R-NH2-TS charge=0 spin=1 mol=H2N6 R-NH2-TS CBS-QB3

lf=-595.6 te\_zpe=-329.407108 te\_gfe=-329.434977 te\_ms\_zpe=-328.948914 te\_ms\_gfe=0.017295

7 0.744103 -0.313896 -0.457667  
7 -0.092325 0.882829 -0.384610  
7 -1.470938 -0.169071 -0.476360  
7 -0.957306 0.545194 0.677392  
7 -0.742393 -0.927547 0.361097  
7 1.870253 -0.008160 0.144973  
1 2.653942 -0.614660 -0.047599  
1 1.886301 0.549216 0.993816

#####

R-NO2-opt charge=0 spin=1 mol=N6O2 R-NO2-opt CBS-QB3

lf=68.7 te\_zpe=-478.606433 te\_gfe=-478.637149 te\_ms\_zpe=-477.968873 te\_ms\_gfe=0.001517

7 -0.043515 -0.000001 -0.730971  
7 -0.949520 0.980284 -0.106928  
7 -2.047243 -0.000001 -0.279182  
7 -1.342948 0.000001 0.961603  
7 -0.949520 -0.980285 -0.106925  
7 1.301425 0.000000 -0.046206  
8 1.763700 1.094170 0.135018  
8 1.763705 -1.094168 0.135015

R-NO2-TS charge=0 spin=1 mol=N6O2 R-NO2-TS CBS-QB3

lf=-738.5 te\_zpe=-478.578739 te\_gfe=-478.610404 te\_ms\_zpe=-477.936721 te\_ms\_gfe=-0.002642

7 0.128930 0.277645 -0.659616  
7 0.992845 -0.828237 -0.478088  
7 2.077029 0.155925 -0.087927  
7 1.490092 -0.464095 0.935955  
7 0.850917 1.165306 -0.029279

7 -1.389961 -0.038104 -0.010611  
8 -1.968948 0.959895 0.269129  
8 -1.662172 -1.194780 0.019242

#####

R-NO-opt charge=0 spin=1 mol=N6O1 R-NO-opt CBS-QB3

lf=142.8 te\_zpe=-403.398658 te\_gfe=-403.427791 te\_ms\_zpe=-402.853099 te\_ms\_gfe=-0.002749

7 0.261159 0.340623 -0.554265  
7 -0.873732 0.956859 0.137523  
7 -1.740495 -0.119712 -0.391700  
7 -1.145181 -0.308270 0.893668  
7 -0.494406 -0.916898 -0.320636  
7 1.497912 0.541740 0.096112  
8 2.182900 -0.432549 0.121887

R-NO-TS charge=0 spin=1 mol=N6O1 R-NO-TS CBS-QB3

lf=-538.1 te\_zpe=-403.375995 te\_gfe=-403.405922 te\_ms\_zpe=-402.828461 te\_ms\_gfe=-0.006727

7 -0.258623 0.428017 -0.299716  
7 0.570956 -0.805890 -0.487891  
7 1.714575 0.118846 -0.334329  
7 1.301221 -0.767063 0.733719  
7 0.791553 1.109238 0.161155  
7 -1.556755 0.438441 0.293361  
8 -2.242561 -0.456391 -0.058012

#####

R-OH-opt charge=0 spin=1 mol=H1N5O1 R-OH-opt CBS-QB3

lf=300.2 te\_zpe=-349.286081 te\_gfe=-349.313619 te\_ms\_zpe=-348.820283 te\_ms\_gfe=0.007133

7 0.659432 0.000117 -0.586809  
7 -0.350391 0.976784 -0.097986  
7 -1.409647 0.000045 -0.427726  
7 -0.878837 -0.000227 0.900090  
7 -0.350264 -0.976669 -0.098340  
8 1.726451 -0.000085 0.306316  
1 2.496338 0.000330 -0.275125

R-OH-TS charge=0 spin=1 mol=H1N5O1 R-OH-TS CBS-QB3

lf=-641.6 te\_zpe=-349.259077 te\_gfe=-349.286824 te\_ms\_zpe=-348.792820 te\_ms\_gfe=0.004410

7 0.715203 -0.339943 -0.463398  
7 -0.041704 0.899926 -0.375766  
7 -1.461778 -0.215162 -0.471445

7 -0.946189 0.583360 0.644078  
7 -0.693995 -0.882713 0.392662  
8 1.899879 -0.110969 0.136164  
1 1.800215 0.569481 0.827763

#####

R-PH2-opt charge=0 spin=1 mol=H2N5P1 R-PH2-opt CBS-QB3

lf=191.6 te\_zpe=-616.051393 te\_gfe=-616.080465 te\_ms\_zpe=-615.214913 te\_ms\_gfe=0.009180

7 0.211544 0.000576 -0.630155  
7 -0.769991 0.975251 -0.100691  
7 -1.857318 0.010955 -0.372032  
7 -1.257832 -0.001858 0.931594  
7 -0.777677 -0.965283 -0.115722  
15 1.819271 -0.113539 0.079267  
1 2.265859 1.079018 -0.532327  
1 1.603993 0.486582 1.352357

R-PH2-TS charge=0 spin=1 mol=H2N5P1 R-PH2-TS CBS-QB3

lf=-477.6 te\_zpe=-616.030600 te\_gfe=-616.060110 te\_ms\_zpe=-615.194687 te\_ms\_gfe=0.006658

7 -0.198833 0.302338 -0.381167  
7 0.811958 -0.694456 -0.631157  
7 1.791919 0.326057 -0.212781  
7 1.468096 -0.733921 0.701025  
7 0.657028 1.068946 0.291121  
15 -1.855414 -0.169027 -0.000994  
1 -2.262472 1.154407 0.284075  
1 -1.617489 -0.501754 1.361550

#####

R-SH-opt charge=0 spin=1 mol=H1N5S1 R-SH-opt CBS-QB3

lf=215.9 te\_zpe=-672.288661 te\_gfe=-672.317424 te\_ms\_zpe=-671.448500 te\_ms\_gfe=0.000518

7 0.226473 0.000000 -0.653469  
7 -0.757348 0.974007 -0.106991  
7 -1.836942 0.000000 -0.370717  
7 -1.231912 0.000000 0.927660  
7 -0.757347 -0.974006 -0.106992  
16 1.752008 0.000000 0.194721  
1 2.467399 0.000000 -0.941982

R-SH-TS charge=0 spin=1 mol=H1N5S1 R-SH-TS CBS-QB3

lf=-653.8 te\_zpe=-672.269091 te\_gfe=-672.297976 te\_ms\_zpe=-671.428400 te\_ms\_gfe=-0.001702

7 0.280624 -0.315871 -0.490284  
7 -0.499094 0.895113 -0.412657  
7 -1.913068 -0.238943 -0.418263  
7 -1.336354 0.561079 0.662366  
7 -1.046332 -0.888373 0.392217  
16 1.820455 0.046521 0.155818  
1 2.472280 -0.835365 -0.626742

#####

R-SIH3-opt charge=0 spin=1 mol=H3N5Si1 R-SIH3-opt CBS-QB3

lf=-147.2 te\_zpe=-564.800518 te\_gfe=-564.829478 te\_ms\_zpe=-563.967378 te\_ms\_gfe=0.016298

7 -0.181411 -0.000003 -0.598160  
7 0.809642 -0.966112 -0.107852  
7 1.893365 0.000003 -0.392336  
7 1.321513 -0.000001 0.926311  
7 0.809637 0.966111 -0.107849  
14 -1.841798 0.000000 0.086154  
1 -1.999500 1.223063 0.898930  
1 -2.785108 -0.000127 -1.045040  
1 -1.999446 -1.222923 0.899155

R-SIH3-TS charge=0 spin=1 mol=H3N5Si1 R-SIH3-TS CBS-QB3

lf=-487.5 te\_zpe=-564.787937 te\_gfe=-564.817932 te\_ms\_zpe=-563.955885 te\_ms\_gfe=0.013872

7 -0.176596 0.276384 -0.400408  
7 0.836663 -0.738447 -0.593215  
7 1.828096 0.305612 -0.250646  
7 1.490501 -0.675719 0.745365  
7 0.708667 1.052417 0.248079  
14 -1.860151 -0.078062 0.085686  
1 -2.433994 1.237911 0.408526  
1 -2.476852 -0.696228 -1.098586  
1 -1.858367 -0.990550 1.246228
